# Supplementary material for: Acid sphingomyelinase deficiency and Gaucher disease: Underdiagnosed and often treatable causes of hepatomegaly, splenomegaly, and low HDL cholesterol in lean individuals
Source: PubMed Central journal article supplement — Hepatol Commun. 2025 Jan 7;9(1):e0621. doi: 10.1097/HC9.0000000000000621 (PMC11717527; doi:10.1097/hc9.0000000000000621), 2025-01-07
Supplement: hc9-9-e0621-s001.pdf [file hc9-9-e0621-s001.pdf]

## Supplemental Digital Content

Mistry PK, et al. Acid Sphingomyelinase Deficiency and Gaucher Disease: Underdiagnosed and Often Treatable Causes of Hepatomegaly, Splenomegaly, and Low HDL Cholesterol in Lean Individuals

**SDC Figure 1. HDL cholesterol over time in the ASCEND trial of olipudase alfa treatment for acid sphingomyelinase deficiency (ASMD)<sup>1</sup> and the ENGAGE trial of eliglustat treatment for Gaucher disease type 1 (GD1)<sup>2</sup>**

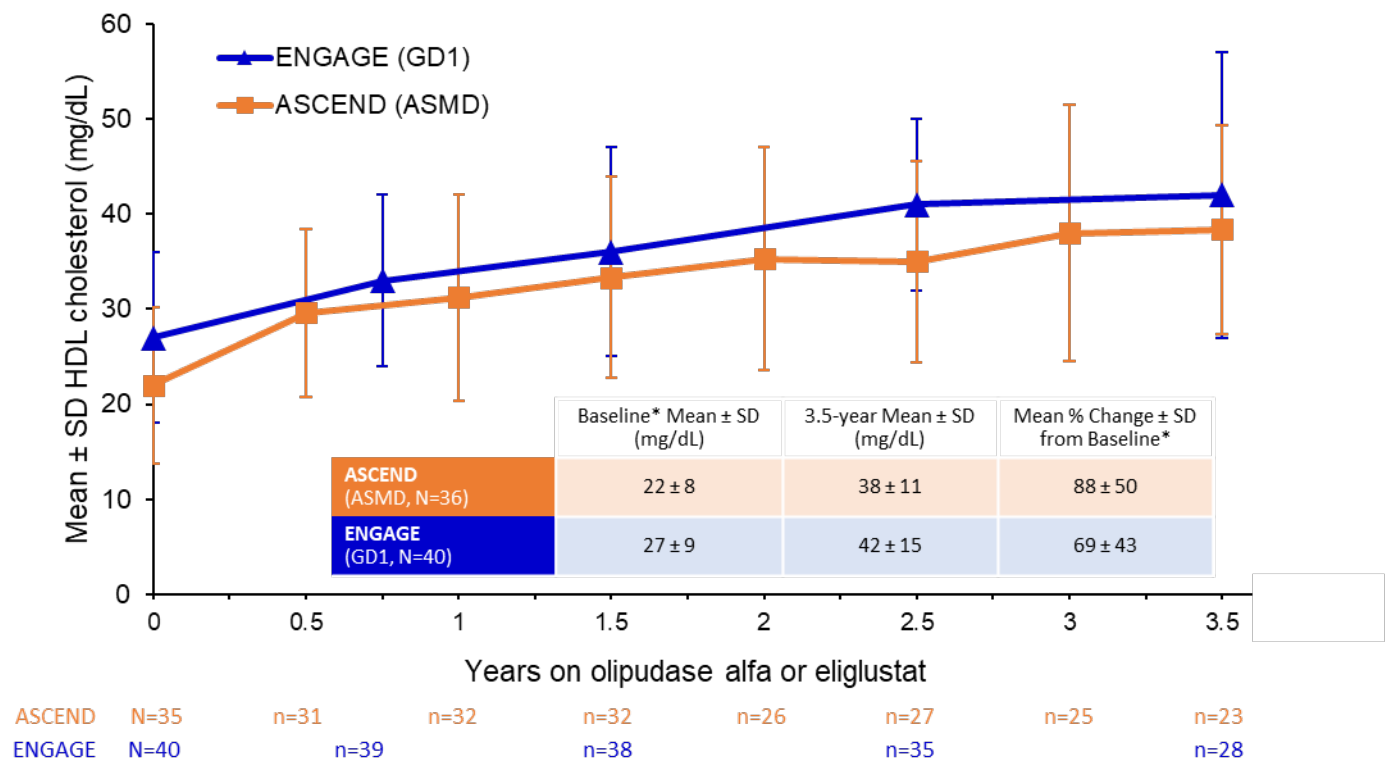

\*Baseline values for original placebo patients refer to day 1 of the open-label trial extensions

1. Wasserstein M, Lachmann R, Hollak C, et al. A randomized, placebo-controlled clinical trial evaluating olipudase alfa enzyme replacement therapy for chronic acid sphingomyelinase deficiency (ASMD) in adults: One-year results. *Genet Med.* 2022;24(7):1425-1436.
2. Mistry PK, Lukina E, Ben Turkia H, et al. Effect of oral eliglustat on splenomegaly in patients with Gaucher disease type 1: the ENGAGE randomized clinical trial. *JAMA.* 2015;313(7):695-706.
